# Supplementary material for: Spontaneous Plants Improve the Inter-Row Soil Fertility in a Citrus Orchard but Nitrogen Lacks to Boost Organic Carbon
Source: MDPI journal article supplement (doi:10.3390/environments9120151), 2022-12-04
Supplement: s1 [file s1]

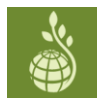

# Spontaneous Plants Improve the Inter-Row Soil Fertility in a Citrus Orchard but Nitrogen Lacks to Boost Organic Carbon

Fernando Visconti <sup>1,2,\*</sup>, Enrique Peiró <sup>1</sup>, Carlos Baixauli <sup>3</sup> and José Miguel de Paz <sup>1</sup>

<sup>1</sup> Instituto Valenciano de Investigaciones Agrarias-IVIA, Centro para el Desarrollo de la Agricultura Sostenible-CDAS, Carretera CV-315, km 10.7, 46113 Moncada, Valencia, Spain

<sup>2</sup> Departamento de Ecología, Centro de Investigaciones Sobre Desertificación-CIDE (CSIC, UVEG, GVA), Carretera CV-315, km 10.7, 46113 Moncada, Valencia, Spain

<sup>3</sup> Fundación Cajamar, Centro de Experiencias Cajamar, Camino del Cementerio Nuevo, s/n, 46200 Paiporta, Valencia, Spain

\* Correspondence: visconti\_fer@gva.es or fernando.visconti@uv.es

**Table S1.** Statistical summary of the properties studied in this work.

| Property                                | Statistical parameter | Natural Scale | Logarithmic Scale | Square Root Scale |
|-----------------------------------------|-----------------------|---------------|-------------------|-------------------|
| $K_s/\text{mm h}^{-1}$                  | Count                 | 23            | 23                |                   |
|                                         | Mean                  | 11.4054996    | 0.9355886         |                   |
|                                         | Std. Dev.             | 8.73277583    | 0.34364052        |                   |
|                                         | Max.                  | 38.6763661    | 1.58744566        |                   |
|                                         | Min.                  | 2.05949776    | 0.31376132        |                   |
|                                         | G1 coeff.             | 1.47539071    | -0.12422107       |                   |
|                                         | $D_{K-S}$             | 0.17169       | 0.12562           |                   |
|                                         | $p_{K-S}$             | 0.4563        | 0.8176            |                   |
| $\rho_b/\text{g cm}^{-3}$               | Count                 | 31            |                   |                   |
|                                         | Mean                  | 1.54110652    |                   |                   |
|                                         | Std. Dev.             | 0.06313108    |                   |                   |
|                                         | Max.                  | 1.65395575    |                   |                   |
|                                         | Min.                  | 1.4002163     |                   |                   |
|                                         | G1 coeff.             | -0.38596346   |                   |                   |
|                                         | $D_{K-S}$             | 0.10739       |                   |                   |
|                                         | $p_{K-S}$             | 0.83          |                   |                   |
| $w_{\text{root}}/\text{mg g}^{-1}$      | Count                 | 12            | 12                | 12                |
|                                         | Mean                  | 0.61716732    | 2.86896138        | 0.61225894        |
|                                         | Std. Dev.             | 0.96155911    | 0.14646293        | 0.51413437        |
|                                         | Max.                  | 3.35659713    | 3.09371755        | 1.83210183        |
|                                         | Min.                  | 0.00428644    | 2.57802927        | 0.06547092        |
|                                         | G1 coeff.             | 2.43539603    | -0.433868         | 1.31494504        |
|                                         | $D_{K-S}$             | 0.30928       | 0.12455           | 0.24128           |
|                                         | $p_{K-S}$             | 0.162         | 0.9808            | 0.4206            |
| $DHA/\text{nmol g}^{-1} \text{ h}^{-1}$ | Count                 | 132           | 132               |                   |
|                                         | Mean                  | 10.4020652    | 0.93268371        |                   |
|                                         | Std. Dev.             | 6.46273192    | 0.28608829        |                   |
|                                         | Max.                  | 40.1855327    | 1.60406973        |                   |
|                                         | Min.                  | 1.12651157    | 0.05173566        |                   |
|                                         | G1 coeff.             | 1.40195447    | -0.49849089       |                   |
|                                         | $D_{K-S}$             | 0.091827      | 0.064931          |                   |
|                                         | $p_{K-S}$             | 0.2156        | 0.6339            |                   |

|                                                                     |                  |                        |             |
|---------------------------------------------------------------------|------------------|------------------------|-------------|
| <i>GLA</i> /μmol g <sup>-1</sup> h <sup>-1</sup>                    | Count            | 90                     | 90          |
|                                                                     | Mean             | 0.49275628             | 2.61346501  |
|                                                                     | Std. Dev.        | 0.31184243             | 0.26458178  |
|                                                                     | Max.             | 1.51717578             | 3.1810359   |
|                                                                     | Min.             | 0.09413131             | 1.97373409  |
|                                                                     | G1 coeff.        | 1.25807268             | 0.0543105   |
|                                                                     | D <sub>K-S</sub> | 0.1625                 | 0.063865    |
|                                                                     | p <sub>K-S</sub> | 0.01521                | 0.8334      |
| <i>E<sub>C-CO2</sub></i> /kg ha <sup>-1</sup> h <sup>-1</sup>       | Count            | 175                    | 175         |
|                                                                     | Mean             | 0.54351149             | 2.57445895  |
|                                                                     | Std. Dev.        | 0.52461876             | 0.39866392  |
|                                                                     | Max.             | 3.58726431             | 3.55476338  |
|                                                                     | Min.             | 0.00421204             | 0.62449259  |
|                                                                     | G1 coeff.        | 2.69819421             | -0.75681889 |
|                                                                     | D <sub>K-S</sub> | 0.17153                | 0.05596     |
|                                                                     | p <sub>K-S</sub> | 6.745 10 <sup>-5</sup> | 0.6435      |
| <i>w<sub>SOC</sub></i> (%)                                          | Count            | 156                    |             |
|                                                                     | Mean             | 0.89641796             |             |
|                                                                     | Std. Dev.        | 0.11951462             |             |
|                                                                     | Max.             | 1.35183945             |             |
|                                                                     | Min.             | 0.38241432             |             |
|                                                                     | G1 coeff.        | -0.04472481            |             |
|                                                                     | D <sub>K-S</sub> | 0.081304               |             |
|                                                                     | p <sub>K-S</sub> | 0.2538                 |             |
| <i>w<sub>N</sub></i> (%)                                            | Count            | 128                    | 128         |
|                                                                     | Mean             | 0.11473438             | 2.05517287  |
|                                                                     | Std. Dev.        | 0.01733815             | 0.06176705  |
|                                                                     | Max.             | 0.18666667             | 2.27106677  |
|                                                                     | Min.             | 0.084                  | 1.92427929  |
|                                                                     | G1 coeff.        | 1.26676347             | 0.77409679  |
|                                                                     | D <sub>K-S</sub> | 0.15876                | 0.12754     |
|                                                                     | p <sub>K-S</sub> | 0.003155               | 0.03109     |
| <i>n<sub>K</sub></i> /<br>mmol <sub>(+)</sub> (100 g) <sup>-1</sup> | Count            | 128                    | 128         |
|                                                                     | Mean             | 2.12037301             | 0.30780881  |
|                                                                     | Std. Dev.        | 0.7465386              | 0.1186054   |
|                                                                     | Max.             | 6.01053762             | 0.77891332  |
|                                                                     | Min.             | 1.17653077             | 0.07060329  |
|                                                                     | G1 coeff.        | 2.99866012             | 1.50463926  |
|                                                                     | D <sub>K-S</sub> | 0.18223                | 0.13286     |
|                                                                     | p <sub>K-S</sub> | 0.0004063              | 0.02181     |
| <i>w<sub>F</sub></i> /mg kg <sup>-1</sup>                           | Count            | 128                    |             |
|                                                                     | Mean             | 64.7363664             |             |
|                                                                     | Std. Dev.        | 32.1763752             |             |
|                                                                     | Max.             | 154.8174               |             |
|                                                                     | Min.             | 6.3407                 |             |
|                                                                     | G1 coeff.        | 0.41451693             |             |
|                                                                     | D <sub>K-S</sub> | 0.056146               |             |
|                                                                     | p <sub>K-S</sub> | 0.8145                 |             |
